# Supplementary material
Source: publisher figshare collection journal article supplement (https://gsajournals.figshare.com/ndownloader/files/10799207)
Supplement: Supplementary file 1 [file 10799207]

## Sheet: Sheet1
	Fronteras S1 Population						Portola S1 Population
	Additive Effect (a)		Dominance Effect (d)				Additive Effect (a)		Dominance Effect (d)
SNP	Effect	p-value	Effect	p-value	|d/a|	R2	a	p-value	d	p-value	|d/a|	R2
AX-89879574	-0.83	<0.001	-0.89	<0.001	1.07	0.85	-1.12	<0.001	-0.94	<0.001	0.84	0.86
AX-166521406	-0.85	<0.001	-0.88	<0.001	1.03	0.85	-	-	-	-	-	-
AX-123360644	-0.85	<0.001	-0.88	<0.001	1.03	0.85	-1.07	<0.001	-0.98	<0.001	0.91	0.85
AX-123357493	-0.84	<0.001	-0.87	<0.001	1.03	0.85	-	-	-	-	-	-
AX-166521396	-0.85	<0.001	-0.86	<0.001	1.01	0.85	-1.12	<0.001	-0.94	<0.001	0.84	0.85
AX-166503947	-0.85	<0.001	-0.88	<0.001	1.03	0.85	-1.07	<0.001	-0.98	<0.001	0.91	0.85
AX-166503945	-0.85	<0.001	-0.88	<0.001	1.03	0.85	-1.06	<0.001	-0.99	<0.001	0.93	0.84
AX-166512058	-0.85	<0.001	-0.87	<0.001	1.02	0.85	-1.07	<0.001	-0.88	<0.001	0.83	0.79
AX-166503965	-0.85	<0.001	-0.87	<0.001	1.02	0.85	-1.06	<0.001	-0.93	<0.001	0.88	0.82
AX-166503941	-0.85	<0.001	-0.87	<0.001	1.02	0.85	-1.07	<0.001	-0.93	<0.001	0.87	0.82
AX-123360640	-0.86	<0.001	-0.86	<0.001	1	0.85	-1.05	<0.001	-0.95	<0.001	0.91	0.81
	-0.848182		-0.873636		1.02636	0.85	-1.07667		-0.946667		0.88	0.832222
